# Supplementary material
Source: publisher site journal article supplement (https://www.dovepress.com/article/610101)
Supplement: Supplementary file 1 [file 610101%20Revised%20Supplementary%20material.docx]

**Supplementary material**

**Supplementary figures**

**
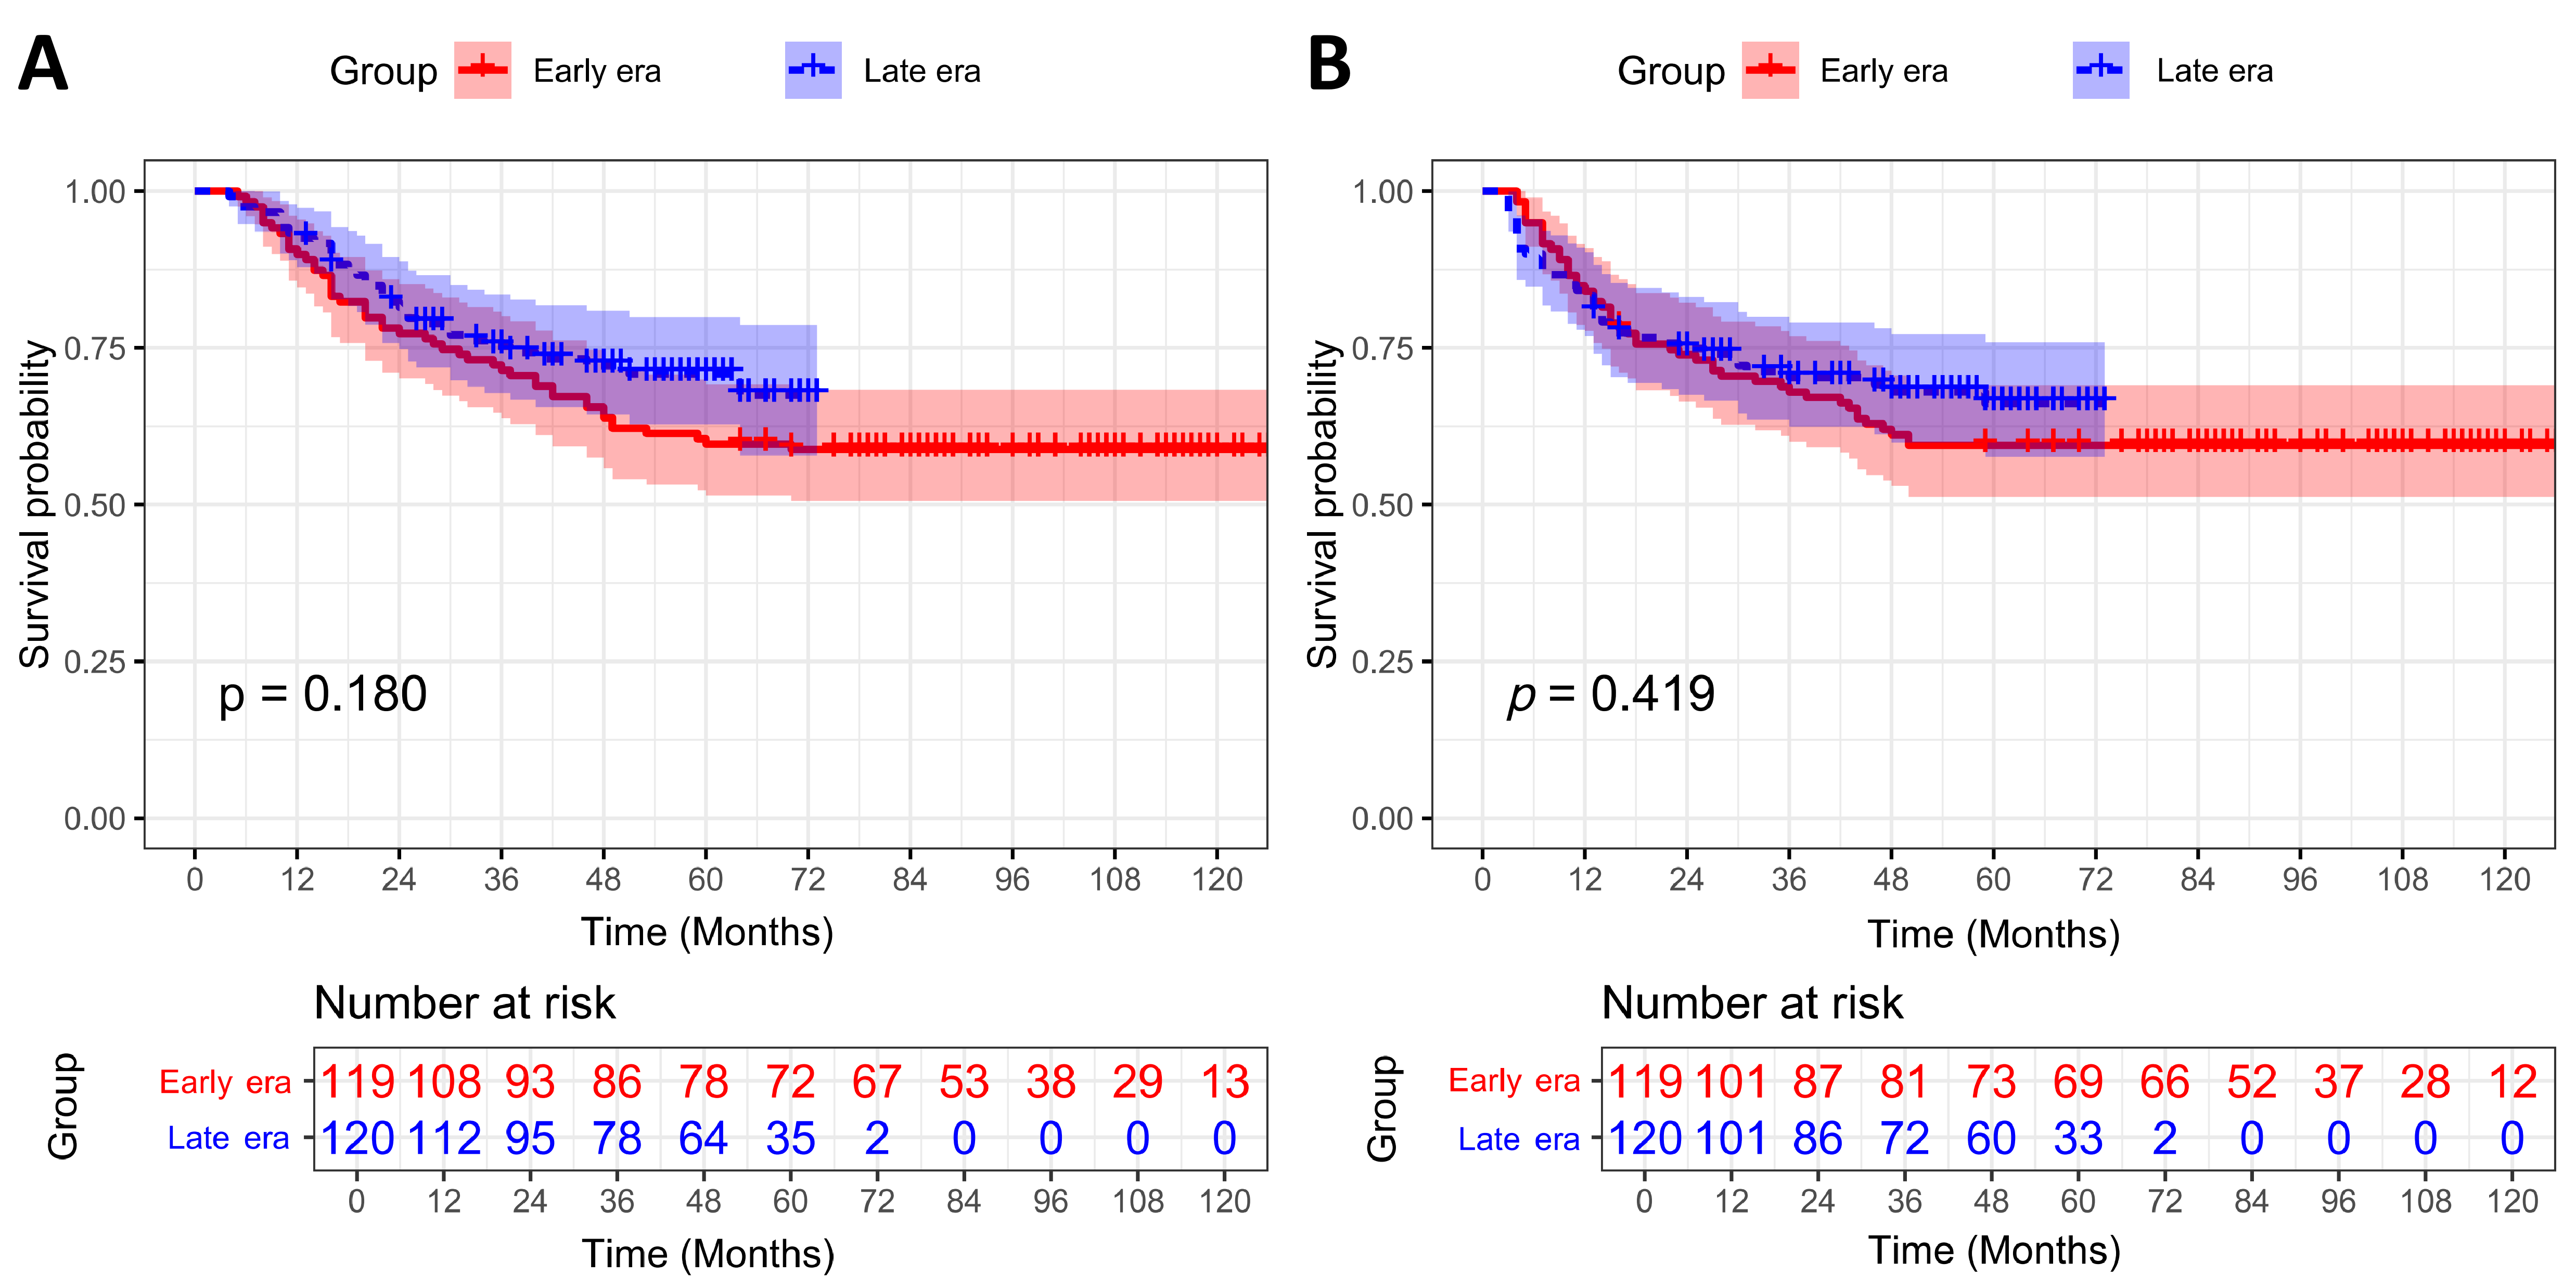
**

**Figure S1: Comparison of postoperative outcome between patients in early era (April 2013 to April 2018) and late era (May 2018 to July 2023)**: (A) Kaplan-Meier curve of overall survival; (B) Kaplan-Meier curve of disease-free survival.


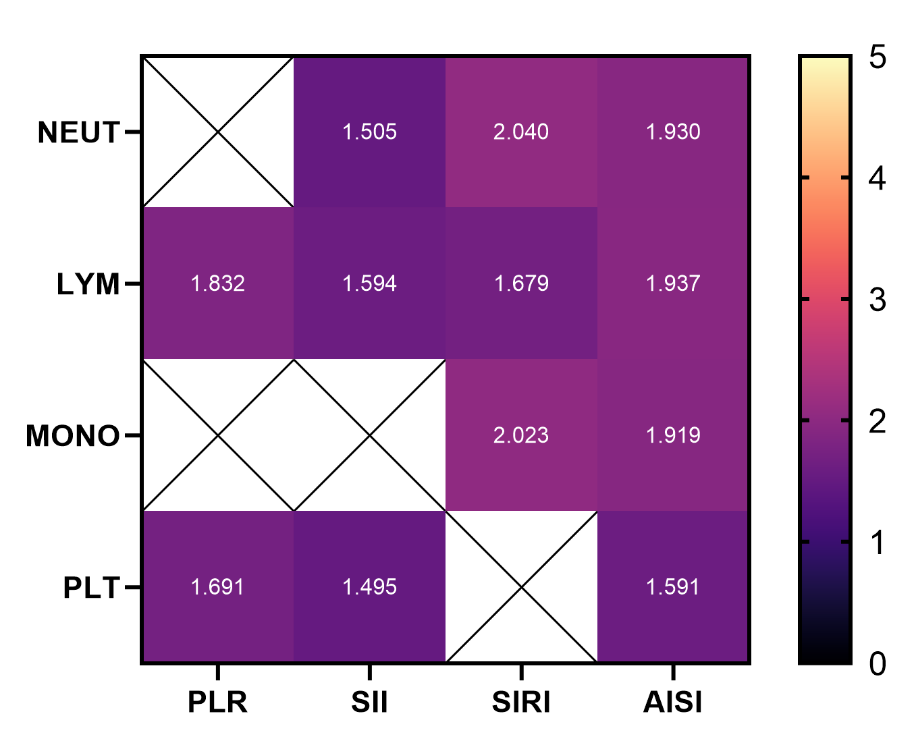


**Figure S2: Variance inflation factor of inflammatory indexes and their components**

**
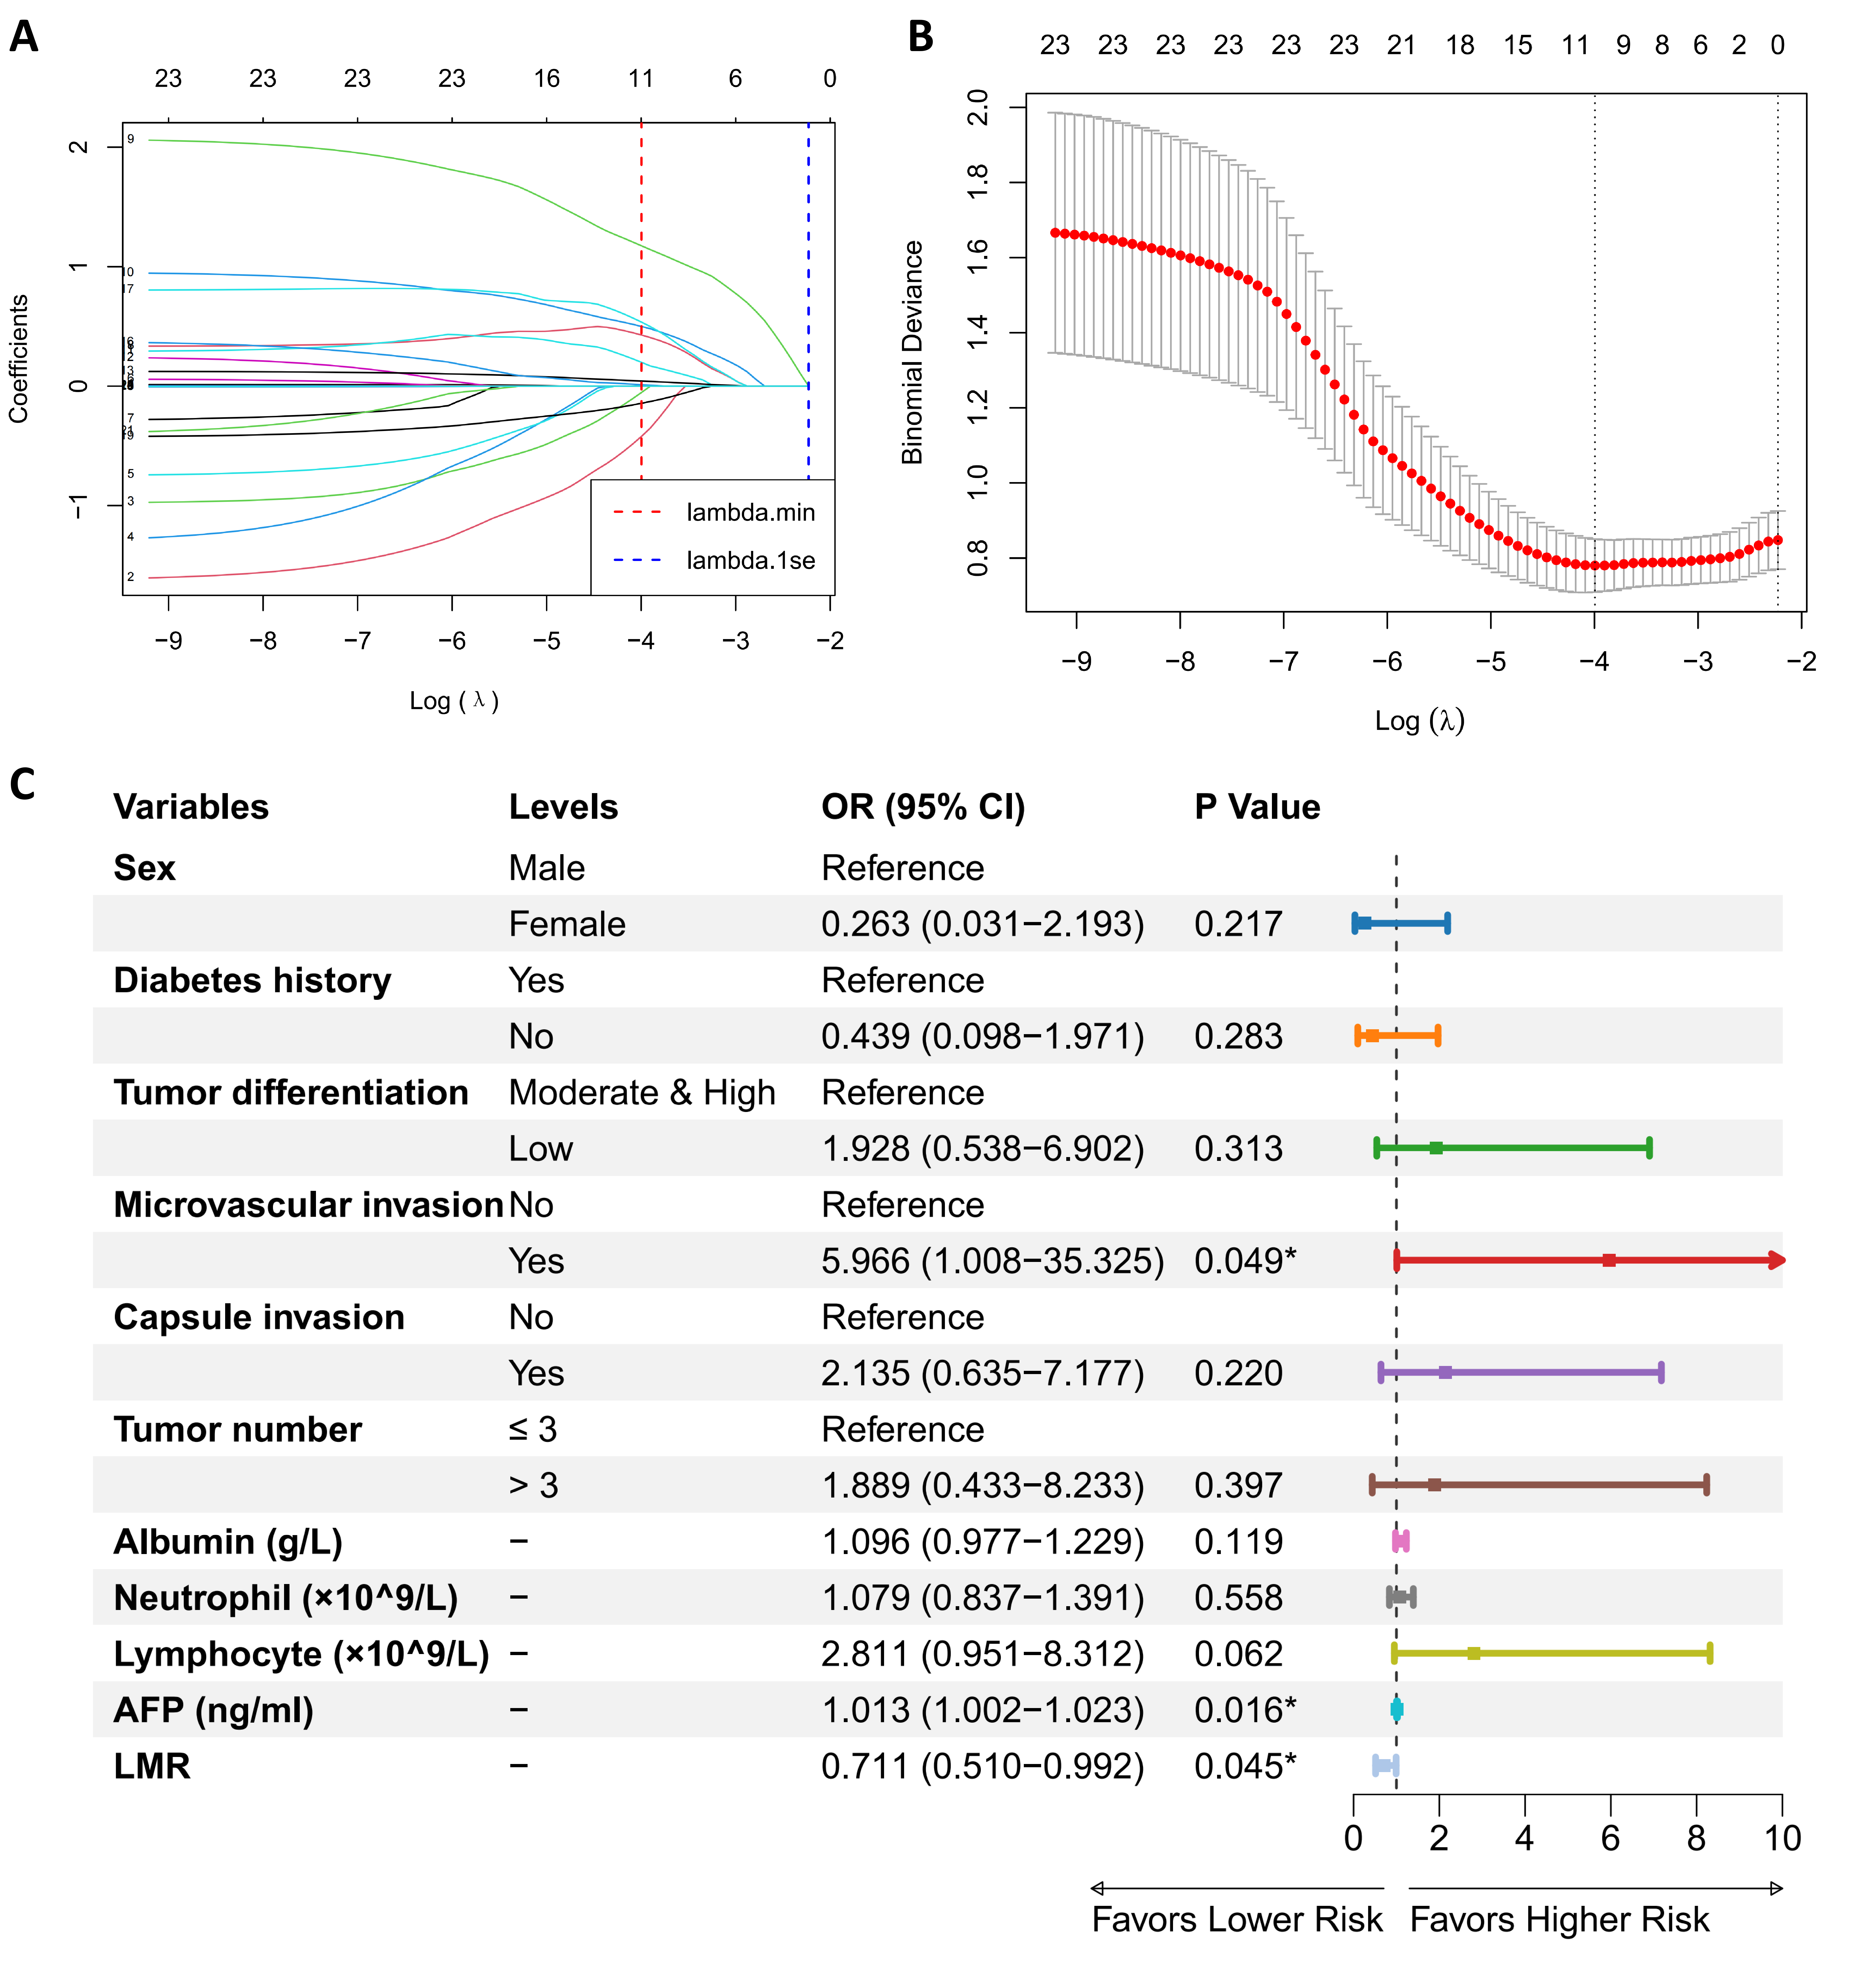
**

**Figure S3: Identification of risk factors for post-transplantation early tumor recurrence in patients without preoperative treatment:** (A) Coefficient path plot of LASSO regression; (B) Cross-validation curve of LASSO regression; (C) Result of multivariate logistic regression for postoperative early tumor recurrence in patients without preoperative treatment(OR: Odds ratio; CI: Confidence interval; AFP: Alpha fetoprotein; * P < 0.05)


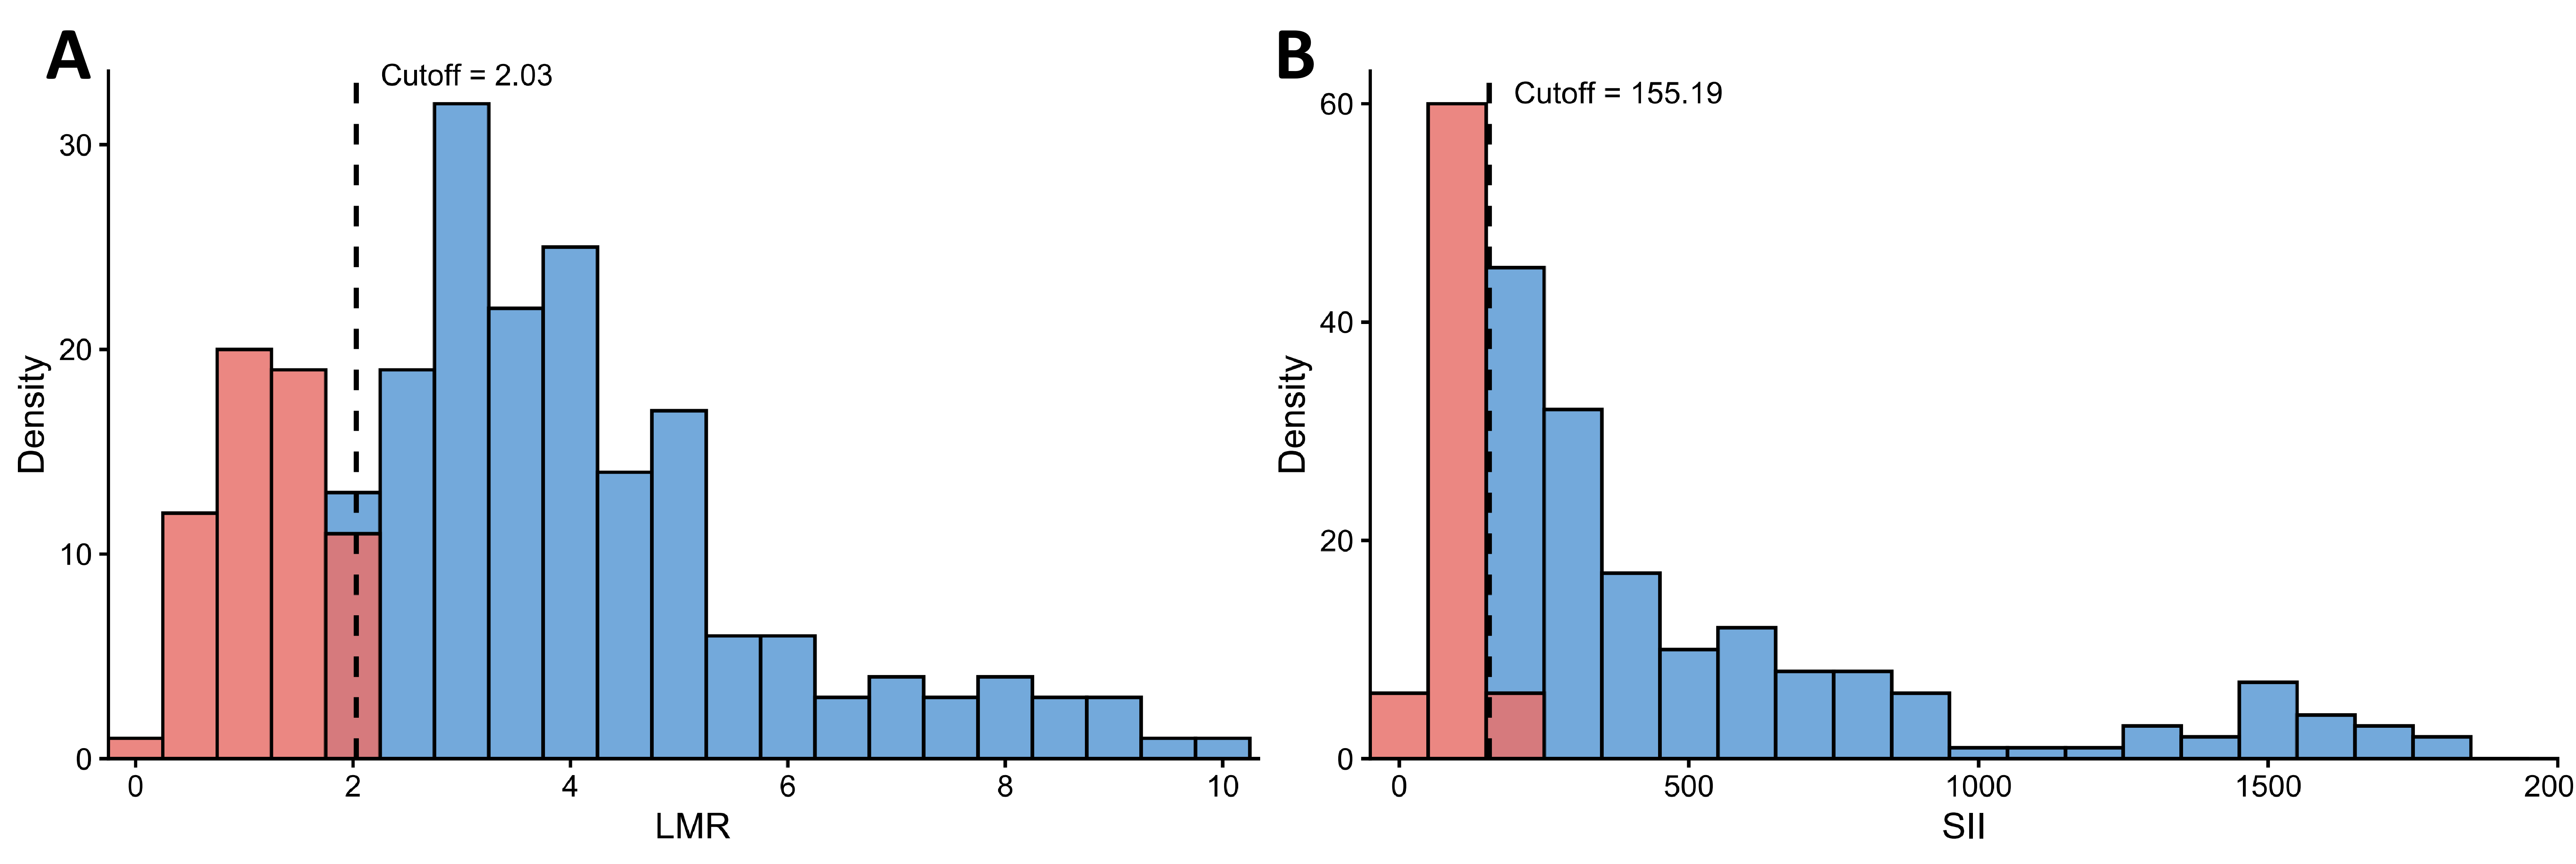


**Figure S4: Histogram of inflammatory indexes after categorized with the cutoff value**: (A) Histogram of lymphocyte-to-monocyte ratio; (B) Histogram of systemic immune-inflammatory index (LMR: Lymphocyte-to-monocyte ratio; SII: Systemic immune-inflammatory index)


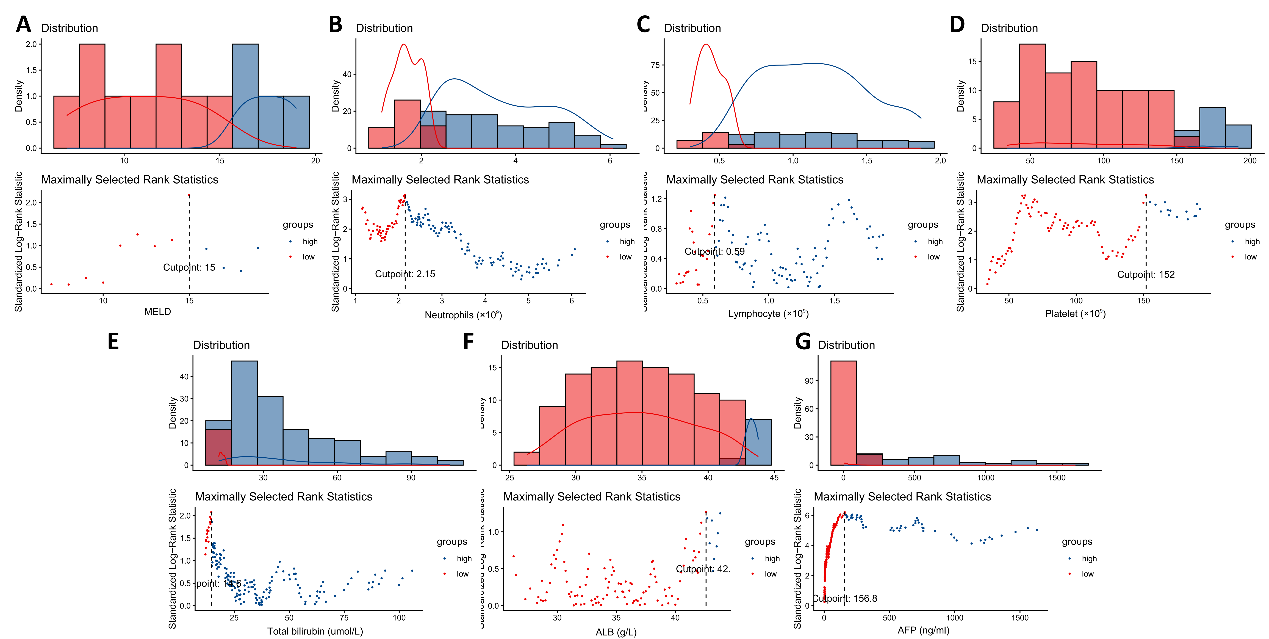


**Figure S5.** **Optimal cutoff value of clinical indexes**: (A) Model of end-stage liver disease; (B) Neutrophil; (C) Lymphocyte; (D) Platelet; (E) Total bilirubin; (F) Albumin; (G) Alpha fetoprotein (MELD: Model of end-stage liver disease; ALB: Albumin; AFP: Alpha fetoprotein)


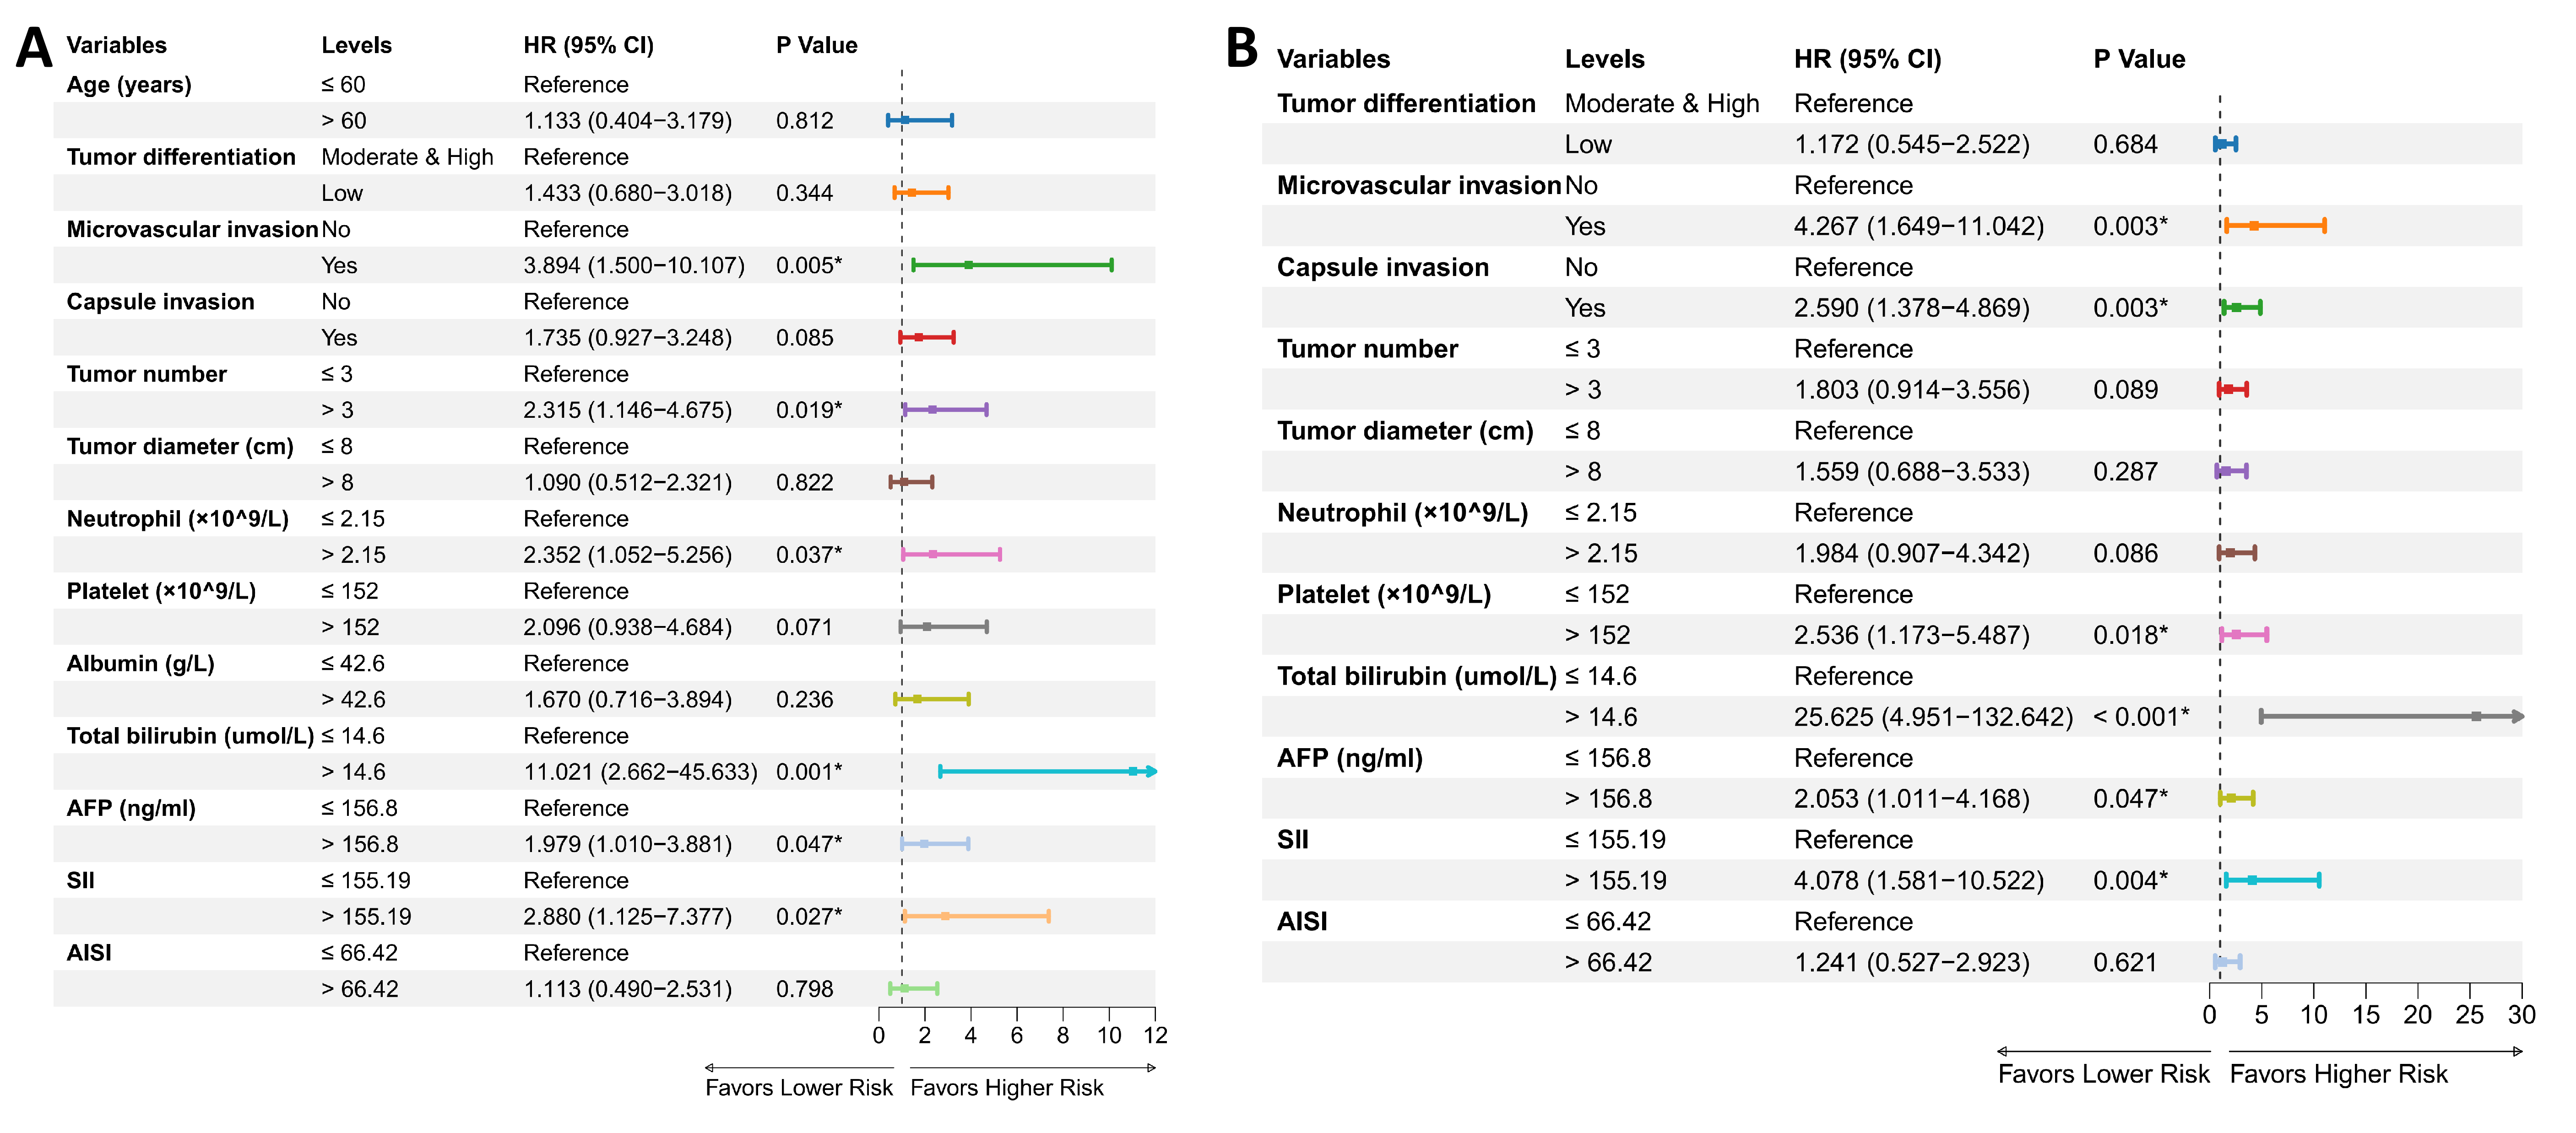


**Figure S6**. **Result of multivariate analysis of independent risk factors for post-transplantation prognosis in patients without preoperative treatment**: (A) Independent risk factor for disease-free survival in patients without preoperative treatment; (B) Independent risk factor for overall survival in patients without preoperative treatment (HR: Hazard ratio; CI: Confidence interval; AFP: Alpha fetoprotein; SII: Systemic immune-inflammation index; AISI: Aggregate index of systemic inflammation; * P < 0.05)


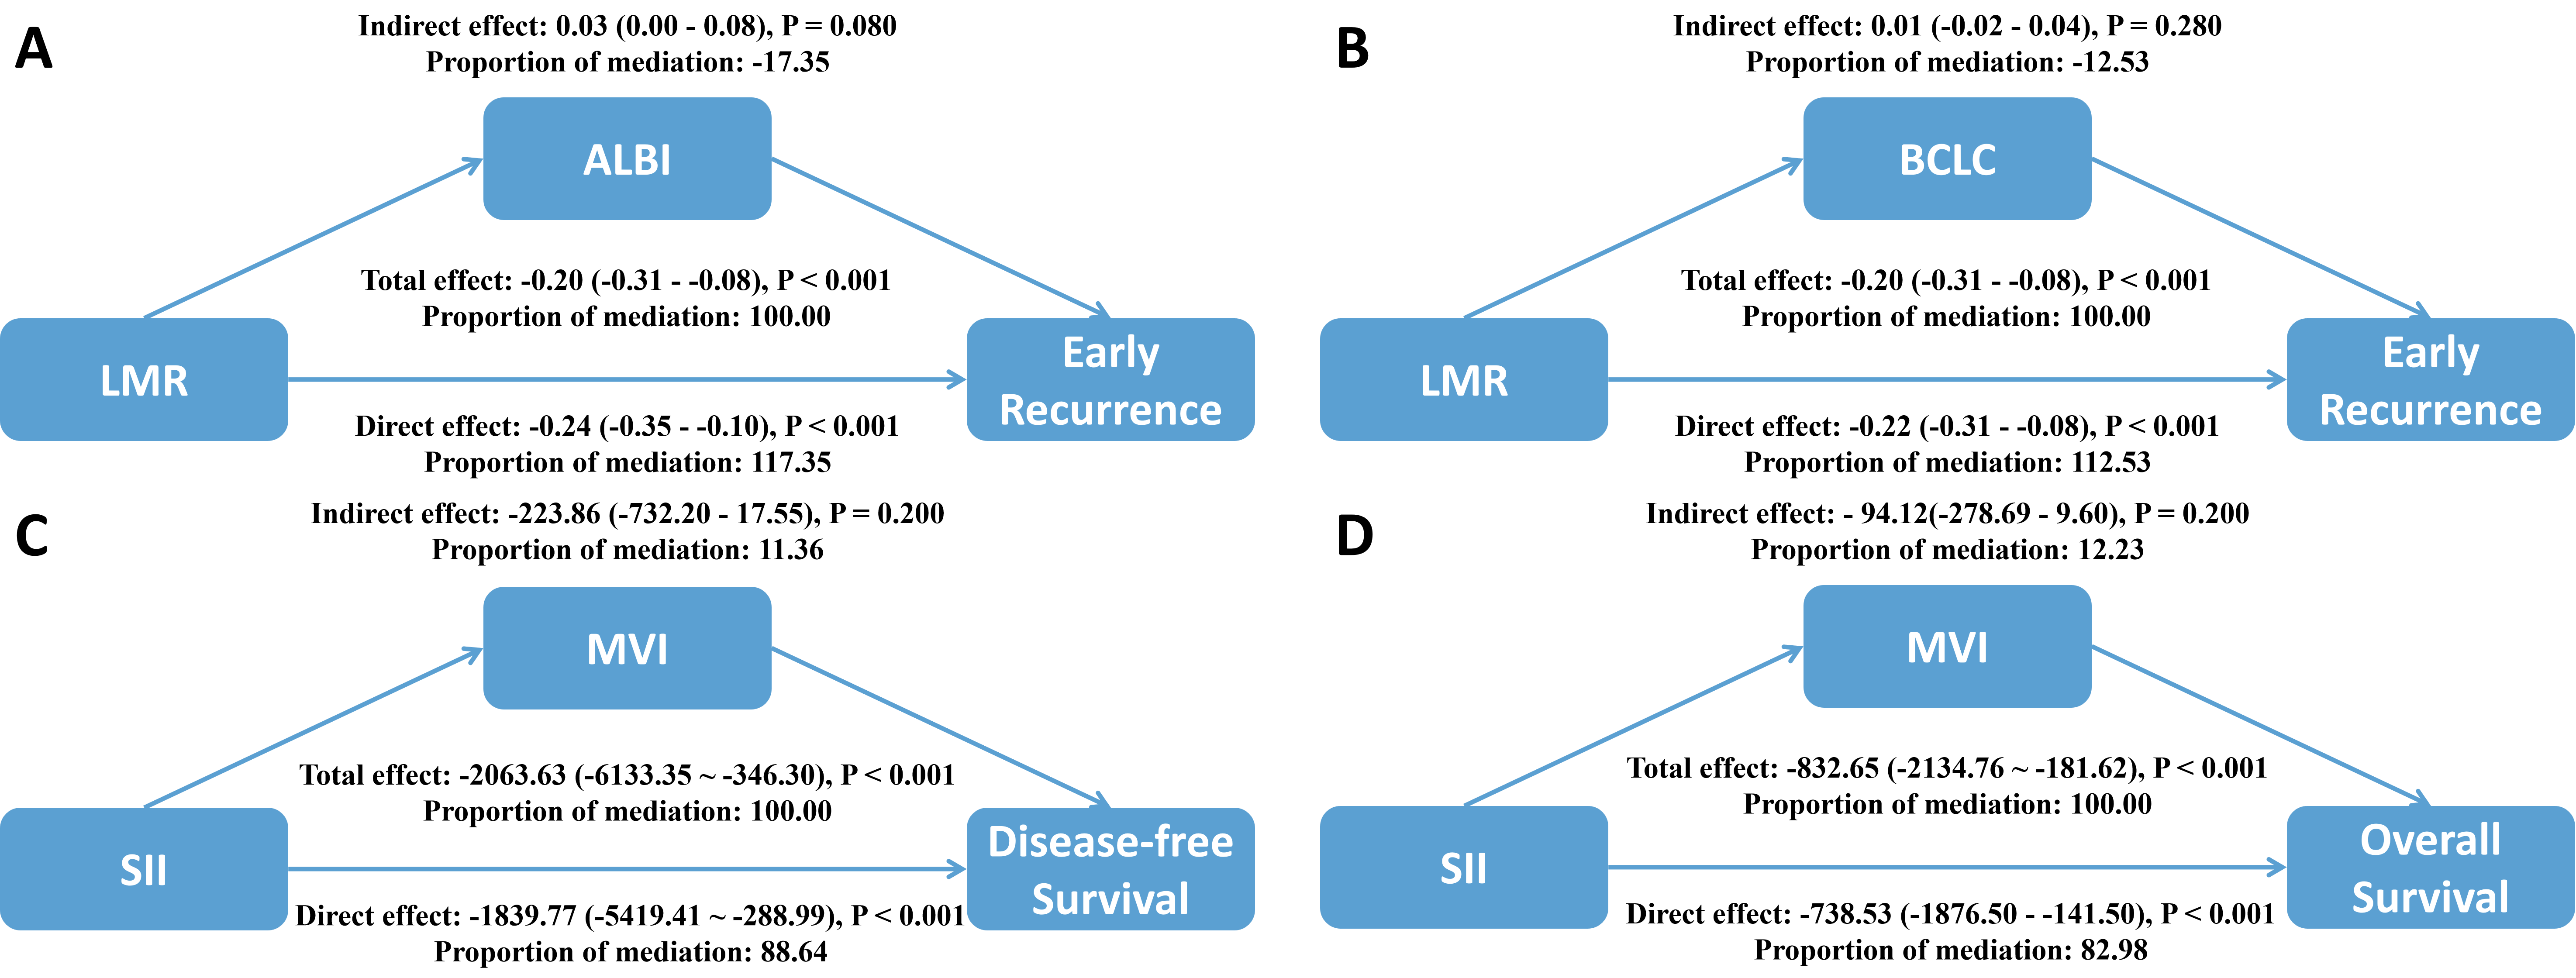


**Figure S7: Mediating effect of liver function and tumor burden between inflammatory indexes and post-transplantation prognosis**: (A) Mediating effect of ALBI between LMR and post-transplantation early recurrence; (B) Mediating effect of BCLC between LMR and post-transplantation early recurrence; (C) Mediating effect of microvascular invasion between LMR and post-transplantation disease-free survival; (D) Mediating effect of microvascular invasion between LMR and post-transplantation overall survival. (LMR: Lymphocyte-to-monocyte ratio; ALBI: Albumin-bilirubin index; BCLC: Barcelona clinic liver cancer; MVI: Microvascular invasion; SII: Systemic inflammatory index).

**Supplementary tables**

**Supplementary table 1. Formula for blood-derived inflammatory indexes**

| **Inflammatory indexes** | **Formula** |
| --- | --- |
| Neutrophil-to-lymphocyte ratio (NLR) | NEUT/LYM |
| Platelet-to-lymphocyte ratio (PLR) | PLT/LYM |
| Lymphocyte-to-monocyte ratio (LMR) | LYM/MONO |
| Platelet-to-white blood cell ratio (PWR) | PLT/WBC |
| Systemic immune-inflammatory index (SII) | (NEUT×PLT)/LYM |
| Systemic inflammation response index (SIRI) | (NEUT×MONO)/LYM |
| Aggregate index of systemic inflammation (AISI) | (NEUT×MONO×PLT)/LYM |
| Neutrophil monocyte-to-lymphocyte ratio (NMLR) | (NEUT+MONO)/LYM |
| Neutrophil-to-albumin ratio (NAR) | NEUT/ALB |
| Neutrophil-to-high density lipoprotein cholesterol ratio (NHR) | NEUT/HDL-c |
| Monocyte-to-high density lipoprotein cholesterol ratio (MHR) | MONO/HDL-c |
| Platelet-to-high density lipoprotein cholesterol ratio (PHR) | PLT/HDL-c |
| Prognostic nutritional index (PNI) | ALB+5×LYM |
| Hemoglobin-to-red blood cell distribution width ratio (HRR) | HB/RDW |

**Supplementary table 2. Number and proportion of missing values for each variable**

| **Variables** | **Missing data [*n*(%)]** |
| --- | --- |
| **Preoperative data** |  |
| Sex | 0 (0.0) |
| Age | 0 (0.0) |
| Diabetes | 0 (0.0) |
| MELD score | 0 (0.0) |
| Primary liver disease | 0 (0.0) |
| Liver cirrhosis | 0 (0.0) |
| Preoperative treatment | 0 (0.0) |
| BCLC stage | 0 (0.0) |
| Milan criteria | 0 (0.0) |
| Hangzhou criteria | 0 (0.0) |
| USCF criteria | 0 (0.0) |
| **Preoperative laboratory tests** |  |
| White blood cell counts | 0 (0.0) |
| Neutrophil counts | 0 (0.0) |
| Lymphocyte counts | 0 (0.0) |
| Monocyte counts | 0 (0.0) |
| Platelet counts | 0 (0.0) |
| Red blood cell counts | 0 (0.0) |
| Red blood cell distribution width | 0 (0.0) |
| Hemoglobin | 0 (0.0) |
| Serum albumin | 0 (0.0) |
| Total bilirubin | 0 (0.0) |
| Alpha fetoprotein | 0 (0.0) |
| Neutrophil-to-lymphocyte ratio | 0 (0.0) |
| Platelet-to-lymphocyte ratio | 0 (0.0) |
| Lymphocyte-to-monocyte ratio | 0 (0.0) |
| Platelet-to-white blood cell ratio | 0 (0.0) |
| Systemic immune-inflammatory index | 0 (0.0) |
| Systemic inflammation response index | 0 (0.0) |
| Aggregate index of systemic inflammation | 0 (0.0) |
| Neutrophil monocyte-to-lymphocyte ratio | 0 (0.0) |
| Neutrophil-to-albumin ratio | 0 (0.0) |
| Neutrophil-to-high density lipoprotein cholesterol ratio | 2 (0.8) |
| Monocyte-to-high density lipoprotein cholesterol ratio | 2 (0.8) |
| Platelet-to-high density lipoprotein cholesterol ratio | 2 (0.8) |
| Prognostic nutritional index | 0 (0.0) |
| Hemoglobin-to-red blood cell distribution width ratio | 0 (0.0) |
| **Intraoperative condition** |  |
| Operation time | 0 (0.0) |
| Anhepatic phase | 7 (2.9) |
| Intraoperative blood loss | 0 (0.0) |
| Intraoperative blood transfusion | 0 (0.0) |
| **Postoperative condition** |  |
| Tumor number | 0 (0.0) |
| Tumor diameter | 0 (0.0) |
| Tumor differentiation | 0 (0.0) |
| Microvascular invasion | 0 (0.0) |
| Capsule invasion | 0 (0.0) |
| Inhospital stay | 1 (0.4) |

**Supplementary Table 3. Univariate analysis for postoperative disease-free and overall survival in patients without preoperative treatment**

| **Variable** | **Number** | **1-year DFS rate (%)** | **5-year DFS rate (%)** | ***χ*2 Value** | ***P* Value** | **1-year OS rate (%)** | **5-year OS rate (%)** | ***χ*2 Value** | ***P* Value** |
| --- | --- | --- | --- | --- | --- | --- | --- | --- | --- |
| Age (years) |  |  |  | 3.874 | **0.049** |  |  | 2.487 | 0.115 |
| ≤ 60 | 106 | 84.9 | 59.4 |  |  | 93.4 | 61.7 |  |  |
| > 60 | 29 | 86.2 | 82.8 |  |  | 89.7 | 79.3 |  |  |
| Sex |  |  |  | 0.498 | 0.480 |  |  | 0.516 | 0.473 |
| Male | 124 | 83.9 | 63.7 |  |  | 91.9 | 65.3 |  |  |
| Female | 11 | 100.0 | 72.7 |  |  | 100.0 | 70.1 |  |  |
| Primary liver disease |  |  |  | 2.423 | 0.120 |  |  | 0.973 | 0.324 |
| Viral hepatitis | 121 | 84.3 | 62.0 |  |  | 92.6 | 64.4 |  |  |
| Other | 14 | 92.9 | 85.1 |  |  | 92.9 | 76.6 |  |  |
| Liver cirrhosis |  |  |  | 0.204 | 0.651 |  |  | 0.899 | 0.343 |
| Yes | 98 | 86.7 | 65.2 |  |  | 93.9 | 68.0 |  |  |
| No | 37 | 81.1 | 62.2 |  |  | 89.2 | 59.5 |  |  |
| MELD score |  |  |  | 2.487 | 0.115 |  |  | 1.042 | 0.307 |
| ≤ 15 | 102 | 86.3 | 59.9 |  |  | 96.1 | 62.3 |  |  |
| > 15 | 33 | 81.8 | 78.8 |  |  | 81.8 | 75.8 |  |  |
| BCLC stage |  |  |  | 1.487 | 0.223 |  |  | 0.144 | 0.705 |
| A - B | 100 | 84.0 | 61.2 |  |  | 93.0 | 63.7 |  |  |
| C - D | 35 | 88.6 | 73.5 |  |  | 91.4 | 70.7 |  |  |
| Differentiation |  |  |  | 22.694 | **< 0.001** |  |  | 17.718 | **< 0.001** |
| Moderate & High | 109 | 89.0 | 72.6 |  |  | 93.6 | 74.4 |  |  |
| Low | 26 | 69.2 | 30.3 |  |  | 88.5 | 34.6 |  |  |
| Tumor number |  |  |  | 16.736 | **< 0.001** |  |  | 14.907 | **< 0.001** |
| ≤ 3 | 110 | 88.2 | 72.1 |  |  | 96.4 | 71.6 |  |  |
| > 3 | 25 | 72.0 | 32.0 |  |  | 76.0 | 40.0 |  |  |
| Tumor diameter (cm) |  |  |  | 25.594 | **< 0.001** |  |  | 17.250 | **< 0.001** |
| ≤ 8 | 111 | 88.3 | 73.3 |  |  | 94.6 | 73.1 |  |  |
| > 8 | 24 | 70.8 | 23.8 |  |  | 83.3 | 29.1 |  |  |
| Microvascular invasion |  |  |  | 33.118 | **< 0.001** |  |  | 30.544 | **< 0.001** |
| Yes | 73 | 75.3 | 42.6 |  |  | 86.3 | 43.8 |  |  |
| No | 62 | 96.8 | 89.8 |  |  | 98.4 | 91.5 |  |  |
| Capsule invasion |  |  |  | 12.265 | **< 0.001** |  |  | 11.583 | **0.001** |
| Yes | 46 | 73.9 | 45.7 |  |  | 84.8 | 49.8 |  |  |
| No | 89 | 91.0 | 74.4 |  |  | 96.6 | 73.8 |  |  |
| Neutrophil counts (×109/L) |  |  |  | 12.526 | **< 0.001** |  |  | 8.402 | **0.004** |
| ≤ 2.15 | 62 | 95.2 | 79.9 |  |  | 98.4 | 77.8 |  |  |
| > 2.15 | 73 | 76.7 | 51.4 |  |  | 87.7 | 55.6 |  |  |
| Lymphocyte counts (×109/L) |  |  |  | .3.280 | 0.070 |  |  | 1.630 | 0.202 |
| ≤ 0.59 | 40 | 90.0 | 77.1 |  |  | 95.0 | 74.7 |  |  |
| > 0.59 | 95 | 83.2 | 59.2 |  |  | 91.6 | 61.9 |  |  |
| Platelet counts (×109/L) |  |  |  | 10.482 | **0.001** |  |  | 7.415 | **0.006** |
| ≤ 152 | 109 | 88.1 | 71.1 |  |  | 94.5 | 70.7 |  |  |
| > 152 | 26 | 73.1 | 38.5 |  |  | 84.6 | 45.5 |  |  |
| Serum albumin (g/L) |  |  |  | 5.451 | **0.020** |  |  | 3.841 | 0.050 |
| ≤ 42.6 | 117 | 88.0 | 67.6 |  |  | 93.2 | 69.2 |  |  |
| > 42.6 | 18 | 66.7 | 44.4 |  |  | 88.9 | 42.9 |  |  |
| Total bilirubin (μmol/L) |  |  |  | 4.295 | **0.038** |  |  | **6.187** | **0.013** |
| ≤ 14.6 | 22 | 95.5 | 85.2 |  |  | 100.0 | 88.9 |  |  |
| > 14.6 | 113 | 83.2 | 60.5 |  |  | 91.2 | 61.2 |  |  |
| Alpha fetoprotein (ng/ml) |  |  |  | 30.180 | **< 0.001** |  |  | 26.472 | **< 0.001** |
| ≤ 156.8 | 94 | 92.6 | 78.3 |  |  | 96.8 | 79.3 |  |  |
| > 156.8 | 41 | 68.3 | 32.1 |  |  | 82.9 | 33.5 |  |  |
| Platelet-to-Lymphocyte Ratio |  |  |  | 3.415 | 0.065 |  |  | 2.840 | 0.092 |
| ≤ 73.4 | 43 | 90.7 | 76.4 |  |  | 95.3 | 76.2 |  |  |
| > 73.4 | 92 | 82.6 | 58.9 |  |  | 91.3 | 60.8 |  |  |
| Systemic immune-inflammation index |  |  |  | 11.972 | **0.001** |  |  | 10.893 | **0.001** |
| ≤ 155.19 | 46 | 100.0 | 83.1 |  |  | 100.0 | 85.3 |  |  |
| > 155.19 | 89 | 77.5 | 54.8 |  |  | 88.8 | 55.8 |  |  |
| Systemic Inflammation Response Index |  |  |  | 2.101 | 0.147 |  |  | 2.251 | 0.134 |
| ≤ 1.41 | 104 | 87.5 | 67.7 |  |  | 94.2 | 67.9 |  |  |
| > 1.41 | 31 | 77.4 | 53.5 |  |  | 87.1 | 57.9 |  |  |
| Aggregate Index of Systemic Inflammation |  |  |  | 8.966 | **0.003** |  |  | 6.660 | **0.010** |
| ≤ 66.42 | 71 | 88.7 | 77.3 |  |  | 93.0 | 77.1 |  |  |
| > 66.42 | 64 | 81.3 | 51.0 |  |  | 92.2 | 54.2 |  |  |

(DFS: Disease-free survival; OS: Overall survival; MELD: Model for end-stage liver disease; BCLC: Barcelona Clinic Liver Cancer)

**Supplementary Table 4. Number of early tumor recurrence in subgroups in patients without preoperative treatment**

| **Subgroups** | **Numbers** | **Early tumor recurrence** | **Non-early tumor recurrence** |
| --- | --- | --- | --- |
| Age (years) |  |  |  |
| ≤ 60 | 184 | 31 (16.85) | 153 (83.15) |
| > 60 | 55 | 8 (14.55) | 47 (85.45) |
| Primary liver diesease |  |  |  |
| Viral hepatitis | 218 | 38 (17.43) | 180 (82.57) |
| Other | 21 | 1 (4.76) | 20 (95.24) |
| Liver cirrhosis |  |  |  |
| No | 62 | 12 (19.35) | 50 (80.65) |
| Yes | 177 | 27 (15.25) | 150 (84.75) |
| BCLC stage |  |  |  |
| A-B | 187 | 31 (16.58) | 156 (83.42) |
| C-D | 52 | 8 (15.38) | 44 (84.62) |
| Preoperative treatment |  |  |  |
| No | 135 | 20 (14.81) | 115 (85.19) |
| Yes | 104 | 19 (18.27) | 85 (81.73) |
| Milan criteria |  |  |  |
| Yes | 111 | 15 (13.51) | 96 (86.49) |
| No | 128 | 24 (18.75) | 104 (81.25) |
| Hangzhou criteria |  |  |  |
| Yes | 193 | 21 (10.88) | 172 (89.12) |
| No | 46 | 18 (39.13) | 28 (60.87) |
| USCF criteria |  |  |  |
| Yes | 141 | 12 (8.51) | 129 (91.49) |
| No | 98 | 27 (27.55) | 71 (72.45) |

(BCLC: Barcelona Clinic Liver Cancer)
